# Supplementary material for: UPA-seq: prediction of functional lncRNAs using differential sensitivity to UV crosslinking
Source: RNA. 2018 Dec;24(12):1785–802. doi: 10.1261/rna.067611.118 (PMC6239193; doi:10.1261/rna.067611.118)
Supplement: Supplemental Material [file supp_067611.118_Supplemental_Table_T1.xlsx]

## Sheet: Sheet1
Supplemental table T1: Primers and antibodies used in this study
qPCR primers
gene	FW	RV
NEAT1	TGTGTGTGTAAAAGAGAGAAGTTGTGG	AGAGGCTCAGAGAGGACTGTAACCTG
RP11-113K21.5	GTTTTAATTGGCAACGCTGG	CAATTGTGGCTCCTTGACCT
RP11-46C20.1	TGTGGATTTGTCAACCAGGA	GCTGAATCACACTGAGCCTA
AC022816.2	GTTGCTGCCAAATCCTGATT	CCTTCCCAGAAGACATACCC
Malat1	TCGGCCTTGTAGATTAAAACGAA	AACGGCCGTCAACTTAACCT
Neat1	gctctgggaccttcgtgactct	ctgccttggcttggaaatgtaa
Gomafu	AAACCTGAGTCCTGGTGTGG	AAAAACAGGTGGCCAAAGTG
Gapdh	cctcgtcccgtagacaaaatg	tctccactttgccactgcaa
primers for FISH probes
mouse genes: PCR products are directly used for in vitro transcription
gene	FW	RV
AC104921.1	GGCCTCAAAGAAATCCTTTGC	gacTAATACGACTCACTATAGGGATCACCCCCATTTTCCACAC
RP24-122I22.2	TAGCCTGTTCCCAAAGGCTC	gacTAATACGACTCACTATAGGGATCAGTAGCCCAGCACCAAG
RP23-316B4.2	CGACACATTGAAGTGAGTGC	gacATTTAGGTGACACTATAGAACATCCCATCTCCAAACAAC
RP24-363O21.3	TCACACTTTTCCCTCTACCC	gacATTTAGGTGACACTATAGTTCCTCTTCCCACAAACGAC
RP23-407N2.2	AGTAATGCTCCTGGTTAATGTC	gacTAATACGACTCACTATAGGGCCTCCTCTGACTATGCTGAC
RP24-473D4.1	GCAGAGTCAGTGTATGAACAG	gacTAATACGACTCACTATAGGGTTTATTTCCACGCCCACAG
RP23-14P23.3	ctacctctgcctttggaatg	gacTAATACGACTCACTATAGGGggaaacaacagcacccatag
RP23-146D13.2	TAGGGCGTAGCTTTCCACAGAC	gacATTTAGGTGACACTATAGTCTCTGCTGTAGGCCAGAATTG
Rab10os	TTTCACGTGAGTGACACTTGG	gacTAATACGACTCACTATAGGGCAGCGATGTCACTTCCTGTC
Mir99ahg	TCGCACAATCAGTGTTTGTC	gacATTTAGGTGACACTATAGGCACCCAGCAGAAATAAAGAG
human genes: subcloned into pCR II
gene	FW	RV
RP11-113K21.5	GGTACTTGTCCCTGTAAAACTG	CTGCTCCCTTTTTACTGACTTC
Rab30 intron	TGAGGTTTGAGTGGGAAGG	CCAGAGACAGCAGTGATGAG
RP11-46C20.1	AAGGAGGAAGAATTTCACACTG	TTTACTGCACTGATGCTGTC
AC022816.2	GGTGTCGTGCAGTAAAGAG	AGCAAGTGTCAAGCAACAG
GAPDH	ATGAGAAGTATGACAACAGCCTCAAGAT	AACTTTGGTATCGTGGAAGGACTCAT
Antibody used
mouse monoclonal anti DIG	Abcam	#ab420
rabbit polyclonal anti FITC	Abcam	#ab19491
anti-mouse Cy3	MerckMillipore	#AP124C
anti-rabbit Cy2	Abcam	#ab6940
